# Supplementary material for: A global dust emission dataset for estimating dust radiative forcings in climate models
Source: Copernicus journal article supplement (doi:10.5194/egusphere-2024-1124), 2024-04-17
Supplement: Supplementary file 1 [file egusphere-2024-1124-supplement.pdf]

# **Supporting information on “A global dust emission dataset for estimating dust radiative forcings in climate models”**

Danny M. Leung<sup>1,2</sup>, Jasper F. Kok<sup>1</sup>, Longlei Li<sup>3</sup>, David M. Lawrence<sup>4</sup>, Natalie M. Mahowald<sup>3</sup>, Simone Tilmes<sup>2</sup>, and Erik Kluzek<sup>4</sup>

<sup>1</sup>Department of Atmospheric and Oceanic Sciences, University of California – Los Angeles, Los Angeles, California, USA

<sup>2</sup>Atmospheric Chemistry Observations and Modeling Laboratory, National Center for Atmospheric Research, Boulder, Colorado, USA

<sup>3</sup>Department of Earth and Atmospheric Sciences, Cornell University, Ithaca, New York, USA

<sup>4</sup>Climate and Global Dynamics Laboratory, National Center for Atmospheric Research, Boulder, Colorado, USA

*Correspondence to:* Danny M. Leung (dleung@ucar.edu)

**Table S1. Models from the Couple Model Intercomparison Project Phase 6 (CMIP6) used in this study.**

| Model name      | Institute                                                                                                                                                                 |
|-----------------|---------------------------------------------------------------------------------------------------------------------------------------------------------------------------|
| CNRM-ESM2-1     | Centre National de Recherches Météorologiques / Centre Européen de Recherche et Formation Avancée en Calcul Scientifique                                                  |
| CESM2-WACCM     | NSF National Center for Atmospheric Research                                                                                                                              |
| CESM2           | NSF National Center for Atmospheric Research                                                                                                                              |
| CanESM5         | Canadian Centre for Climate Modelling and Analysis                                                                                                                        |
| GFDL-ESM4       | NOAA Geophysical Fluid Dynamics Laboratory                                                                                                                                |
| GISS-E2-1-G     | NASA Goddard Institute for Space Studies                                                                                                                                  |
| GISS-E2-2-G     | NASA Goddard Institute for Space Studies                                                                                                                                  |
| HadGEM3-GC31-LL | Met Office Hadley Centre                                                                                                                                                  |
| INM-CM5-0       | Institute for Numerical Mathematics                                                                                                                                       |
| IPSL-CM6A-LR    | Institut Pierre-Simon Laplace                                                                                                                                             |
| MIROC-ES2H      | Japan Agency for Marine-Earth Science and Technology, Atmosphere and Ocean Research Institute (The University of Tokyo), and National Institute for Environmental Studies |
| MIROC-ES2L      | Japan Agency for Marine-Earth Science and Technology, Atmosphere and Ocean Research Institute (The University of Tokyo), and National Institute for Environmental Studies |
| MPI-ESM-1-2-HAM | Max Planck Institute                                                                                                                                                      |
| MRI-ESM2-0      | Meteorological Research Institute                                                                                                                                         |
| NorESM2-LM      | Norwegian Climate Centre                                                                                                                                                  |
| TaiESM1         | Academia Sinica                                                                                                                                                           |
| UKESM1-0-LL     | Natural Environment Research Council, and Met Office                                                                                                                      |
|                 |                                                                                                                                                                           |

**Table S2. Default and modified dust refractive indices for shortwave (SW) bands in the RRTMG radiative transfer model in the CESM2. The modified dust refractive indices are from Di Biagio et al. (2020).**

| Wavenumber (cm <sup>-1</sup> ) | Wavelength (nm) | Default CAM6 dust real refractive index | Modified dust real refractive index in this study | Default CAM6 dust imaginary refractive index | Modified dust imaginary refractive index in this study |
|--------------------------------|-----------------|-----------------------------------------|---------------------------------------------------|----------------------------------------------|--------------------------------------------------------|
| 820–2600                       | 3846–12195      |                                         | 1.18                                              |                                              | -0.101                                                 |
| 2600–3250                      | 3076–3846       |                                         | 1.51                                              |                                              | -0.0184                                                |
| 3250–4000                      | 2500–3076       |                                         | 1.52                                              |                                              | -0.0284                                                |
| 4000–4650                      | 2150–2500       |                                         | 1.54                                              |                                              | -0.00736                                               |
| 4650–5150                      | 1942–2150       |                                         | 1.56                                              |                                              | -0.0007                                                |
| 5150–6150                      | 1626–1942       |                                         | 1.56                                              |                                              | -0.0007                                                |
| 6150–7700                      | 1298–1626       |                                         | 1.56                                              |                                              | -0.000771                                              |
| 7700–8050                      | 1242–1298       |                                         | 1.56                                              |                                              | -0.000870                                              |
| 8050–12850                     | 778–1242        | 1.56                                    | 1.52                                              | -0.001                                       | -0.0006                                                |
| 12850–16000                    | 625–778         | 1.56                                    | 1.52                                              | -0.00125                                     | -0.0006                                                |
| 16000–22650                    | 442–625         | 1.56                                    | 1.52                                              | -0.00195                                     | -0.0014                                                |
| 22650–29000                    | 345–442         | 1.56                                    | 1.52                                              | -0.00415                                     | -0.0019                                                |
| 29000–38000                    | 263–345         | 1.56                                    | 1.52                                              | -0.0055                                      | -0.0026                                                |
| 38000–50000                    | 200–263         | 1.56                                    | 1.52                                              | -0.0055                                      | -0.0026                                                |

**Table S3. Pearson correlation coefficients between the decadal dust depositions fluxes from the sedimentary and ice core records and from the CESM2–L23 and the CESM2–DustCOMM runs.**

|                   | CESM2–L23 | CESM2–DustCOMM |
|-------------------|-----------|----------------|
| NEGIS             | 0.12      | –0.24          |
| GISP2             | 0.20      | –0.20          |
| X20D              | –0.22     | 0.61           |
| Mount Logan       | 0.03      | 0.22           |
| Motianling        | –0.37     | 0.80           |
| Pt. d Escuminac   | 0.19      | 0.91           |
| Dasuopo           | –0.20     | 0.28           |
| Mt. Everest 1     | –0.15     | 0.81           |
| Mt. Everest 2     | –0.11     | 0.68           |
| Mauritania Canyon | –0.14     | 0.79           |
| Snowy Mountains   | –0.15     | 0.85           |
| Law. Dome         | –0.06     | –0.17          |
| Siple Station     | 0.04      | –0.07          |
| James Ross Island | –0.09     | 0.66           |
| San Juan Lakes    | 0.35      | –0.52          |
| Andros Island     | –0.09     | –0.13          |
| Colle Gnifetti    | 0.08      | 0.68           |
| Lake Bastani      | –0.15     | –0.46          |
| Sal. Island       | –0.33     | 0.97           |

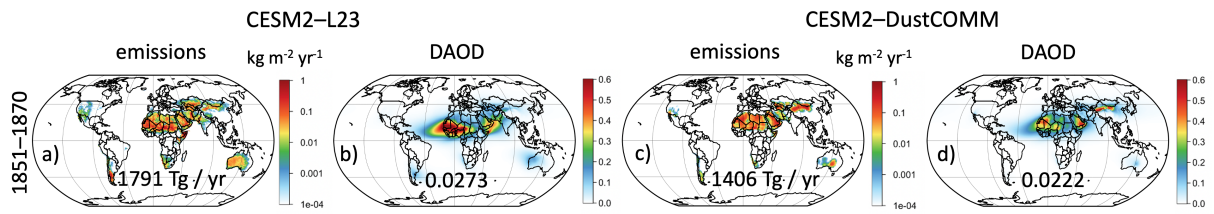

**Figure S1.** The CESM2 dust cycle simulation using the Leung et al. (2023; L23) dust emission scheme and the DustCOMMv1 emission dataset derived in this study. (a-b) The CESM2–L23 simulated emissions and DAOD maps averaged across 1851–1870, and (c-d) same maps but for the CESM2–DustCOMM run.
